# Supplementary material for: Preparation of polyaniline (PANI)-coated Fe3O4 microsphere chains and PANI chain-like hollow spheres without using surfactants
Source: Royal Society of Chemistry journal article supplement (doi:10.1039/c5ra20330a), 2015-01-01
Supplement: c5ra20330a1.pdf [file c5ra20330a1.pdf]

## Supporting Information

### Characterization

X-ray diffraction patterns (XRD) were got on a Shimadzu XRD-7000S diffractometer with  $\text{Cu}_{k\alpha}$  radiation ( $\lambda=1.548\text{\AA}$ ) from 20 to 80°. Fourier transform infrared spectra (FTIR) were obtained on a Bruker TENSOR 27 spectrometer. The measurement of PANI coating shells was proceeded on a Nano Measurer software. Field emission scanning electron microscopy (FE-SEM) images were generated with JEOL JSM-6700F microscope. Samples dispersed in ethanol were deposited onto silicon wafers and sputtered with platinum by a JFC-1600 auto fine coater at a current of 20mA for 300s before observation.

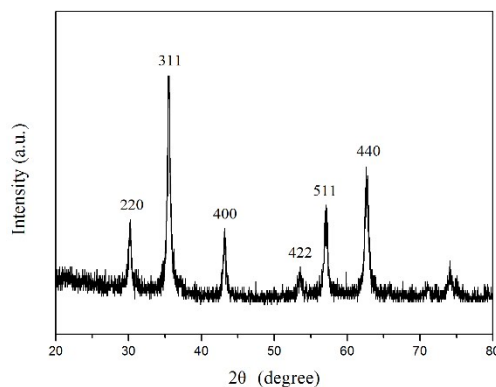

Figure S1. XRD pattern of Fe<sub>3</sub>O<sub>4</sub> microspheres.

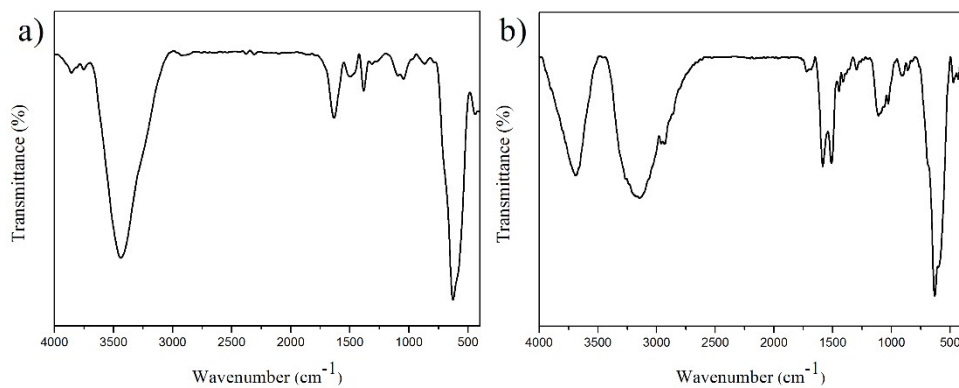

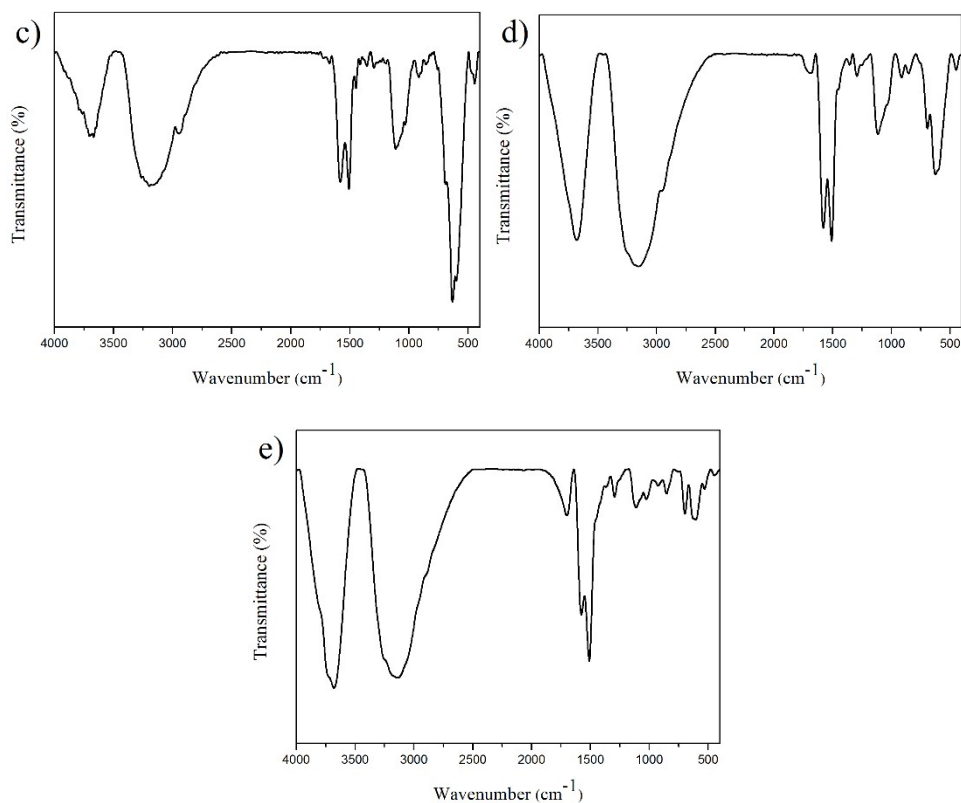

Figure S2. FTIR spectra of PANI-coated  $\text{Fe}_3\text{O}_4$  microspheres chains (PFMC) composites obtained with different dosages of aniline: (a): 0.050mL, (b): 0.10mL, (c): 0.20mL, (d): 0.25 mL, (e): 0.30mL.

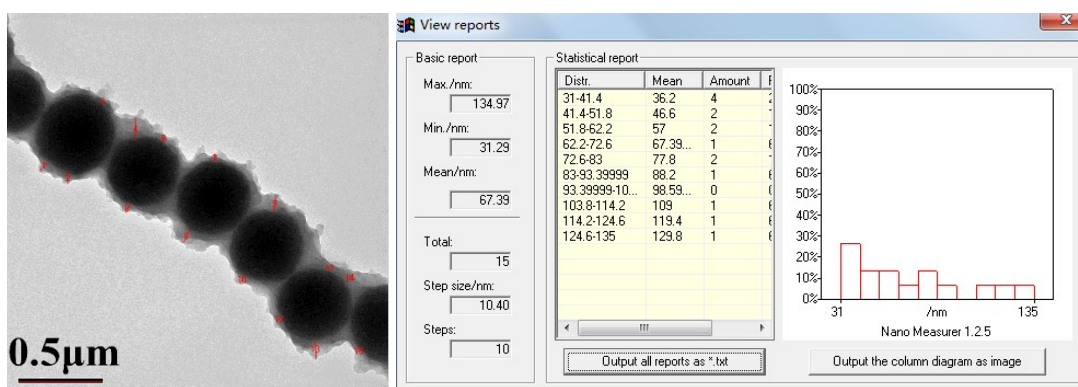

Figure S3. (a) TEM image of PFMC composites (figure 4 (c2)) with the measurement of PANI coating shell, (b) the view reports about the measurement results.

FTIR spectra of PANI-coated  $\text{Fe}_3\text{O}_4$  microspheres chains (PFMC) composites obtained with different dosages of aniline: (a): 0.050mL, (b): 0.10mL, (c): 0.20mL, (d): 0.25mL, (e): 0.30mL

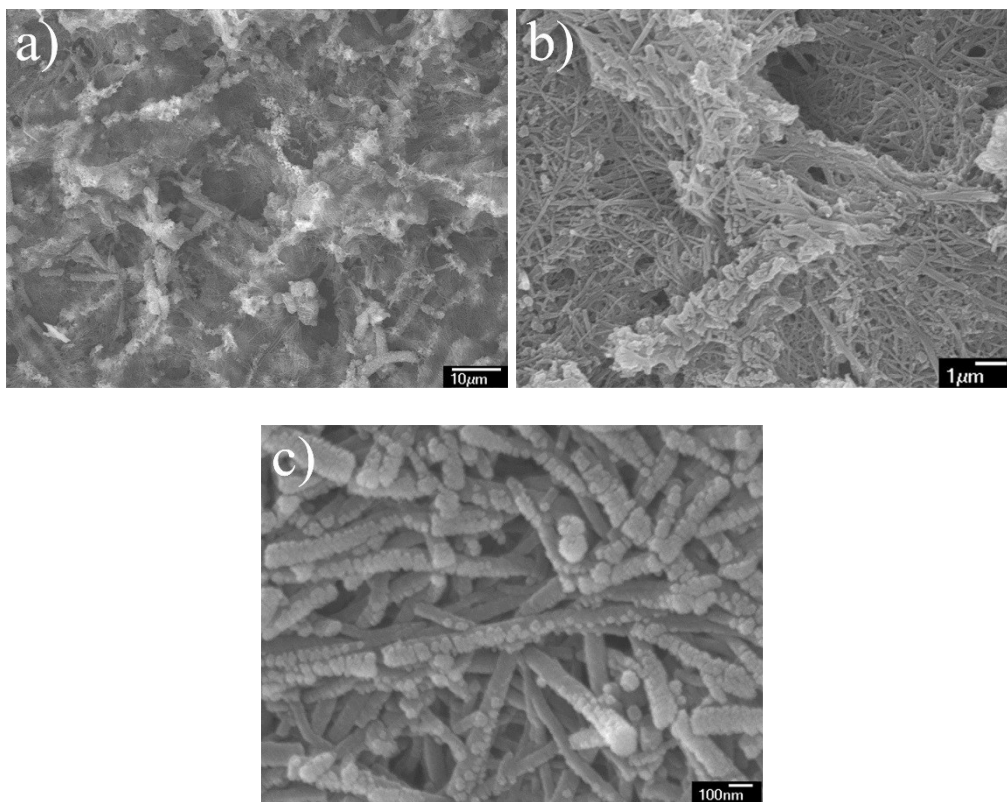

Figure S4. SEM images of PFMC composites and PANI nanofibers at different magnifications (aniline: 0.50mL).
